# Supplementary material for: Unraveling the genetic diversity and structure of Quercus liaotungensis population through analysis of microsatellite markers
Source: PeerJ. 2021 Apr 14;9:e10922. doi: 10.7717/peerj.10922 (PMC8052960; doi:10.7717/peerj.10922)
Supplement: Supplemental Information 5 [file peerj-09-10922-s005.xlsx]

## Sheet: Sheet1
CODE	population	bcqm41	bcqm41	ssrQqZAG 36	ssrQqZAG 36	bcqm42	bcqm42	Qden 05011	Qden 05011	bcqm50	bcqm50	quru-GA-0C11	quru-GA-0C11	bcqm94	bcqm94	MSQ4	MSQ4	bcqm96	bcqm96	ssrQrZAG 96	ssrQrZAG 96	bcqm325	bcqm325	bcqm74	bcqm74	ssrQrZAG 7	ssrQrZAG 7	Qden 03032	Qden 03032	ssrQrZAG 87	ssrQrZAG 87	ssrQrZAG 101	ssrQrZAG 101	MSQ13	MSQ13	ssrQrZAG 112	ssrQrZAG 112	bcqm76	bcqm76
1-01	PS	139	177	226	226	128	136	195	203	115	115	228	244	150	152	221	221	123	125	175	179	106	116	141	155	140	148	412	412	121	125	173	173	239	239	110	110	184	190
1-02	PS	127	139	226	226	134	134	191	215	115	121	228	236	150	152	223	223	123	127	175	177	106	116	151	151	144	148	412	420	125	135	175	177	213	239	104	112	182	188
1-03	PS	143	151	226	230	136	138	203	207	119	119	230	246	148	150	223	241	123	131	171	189	116	116	151	151	136	156	412	420	125	125	173	175	213	239	104	108	186	186
1-04	PS	127	151	226	230	130	130	187	193	117	117	230	234	144	152	225	225	123	125	175	179	114	116	155	155	136	148	412	420	123	125	173	173	241	243	110	126	186	186
1-05	PS	123	139	228	230	130	140	193	205	117	117	228	232	150	150	213	221	123	127	165	189	116	116	159	163	150	150	412	418	121	137	173	177	243	253	100	102	190	212
1-06	PS	145	145	230	232	130	132	187	189	115	117	228	232	148	150	223	223	123	123	185	187	106	106	151	151	132	162	412	412	125	125	173	177	239	239	102	104	186	188
1-07	PS	127	139	228	230	136	138	187	201	117	117	226	228	144	152	221	223	123	125	185	185	116	116	155	155	142	142	414	418	125	125	173	183	237	239	102	106	192	200
1-08	PS	139	151	226	230	136	138	193	201	121	121	216	230	144	150	223	241	123	125	185	185	106	116	159	159	144	150	410	420	121	137	175	177	239	239	108	108	185	185
1-09	PS	139	139	226	230	134	136	191	203	115	117	228	248	148	150	219	225	123	125	169	181	106	114	151	153	136	152	414	418	125	125	175	179	241	247	104	114	192	194
1-10	PS	123	169	230	230	136	136	201	205	115	115	228	230	148	150	221	223	127	133	173	181	106	118	151	155	144	150	410	424	125	137	171	175	239	243	104	112	186	204
2-01	HH	143	149	226	226	130	132	191	193	115	117	218	230	144	148	219	219	123	125	177	179	112	116	151	157	140	156	412	436	125	125	171	173	213	239	102	106	186	192
2-02	HH	143	157	230	230	130	138	185	191	115	115	234	236	148	150	221	221	123	123	179	181	106	106	147	157	150	152	412	412	125	125	171	177	217	239	104	104	190	190
2-03	HH	143	145	218	218	136	136	195	209	119	123	230	232	148	150	0	0	121	121	177	177	112	116	155	155	136	140	412	432	125	137	163	175	237	241	104	104	182	182
2-04	HH	139	143	230	234	130	142	207	207	115	117	230	230	144	146	0	0	123	125	173	175	116	116	157	157	132	138	412	418	123	133	173	173	213	239	102	104	208	208
2-05	HH	139	143	226	230	130	138	193	203	115	121	216	228	150	150	221	221	123	135	163	173	106	116	155	165	140	144	412	424	123	127	171	173	239	241	102	112	186	186
2-06	HH	139	151	230	230	128	136	197	205	115	117	222	230	146	148	225	227	123	127	177	191	116	116	161	161	138	152	412	432	125	133	173	173	239	241	94	108	190	190
2-07	HH	139	149	226	228	136	136	191	201	115	119	216	228	146	148	219	221	123	127	177	193	106	116	155	161	162	166	412	432	125	125	173	173	213	239	102	104	184	184
2-08	HH	143	143	232	232	136	138	191	205	115	117	232	246	148	148	219	219	125	139	169	183	110	112	151	151	142	160	412	432	125	125	167	173	239	239	104	104	192	192
2-09	HH	147	149	226	228	134	136	187	189	115	115	228	230	150	154	223	223	123	123	169	181	106	118	155	155	136	136	412	412	121	121	173	173	239	239	102	108	184	190
2-10	HH	139	149	226	228	130	136	189	203	115	117	222	228	144	148	223	223	121	127	163	175	116	116	151	165	142	144	402	412	125	135	157	173	213	251	96	102	186	186
3-01	LY	139	151	226	234	134	138	195	195	115	115	216	238	144	152	221	221	123	125	169	183	106	106	153	161	144	160	414	418	145	145	173	175	239	239	102	104	186	186
3-02	LY	139	143	226	230	136	136	205	215	115	115	216	226	148	150	225	233	127	133	181	189	106	114	151	155	150	152	412	412	125	135	173	173	213	239	108	108	184	184
3-03	LY	129	139	226	230	128	142	193	197	117	121	236	246	142	150	223	223	121	123	175	183	116	116	153	159	136	150	418	420	135	135	171	175	241	253	102	104	190	190
3-04	LY	143	143	226	226	130	142	185	195	115	117	228	234	150	154	217	217	123	125	175	181	106	122	141	157	142	158	412	422	125	135	173	177	239	241	94	102	194	194
3-05	LY	139	143	226	230	136	138	191	193	115	117	234	234	148	154	0	0	123	133	165	165	116	116	155	155	136	166	418	420	125	135	175	179	239	239	102	104	182	192
3-06	LY	135	137	226	228	134	134	189	217	117	117	230	234	150	150	223	223	123	133	181	193	106	114	155	159	152	162	412	412	121	135	159	173	213	243	102	104	186	186
3-07	LY	149	149	226	226	130	136	187	205	119	125	214	236	150	150	225	225	123	127	179	181	104	106	155	163	152	152	412	418	125	137	173	175	241	241	88	102	190	190
3-08	LY	149	151	226	240	132	142	187	205	115	117	232	232	150	152	223	223	115	125	181	181	114	116	155	155	140	158	412	414	125	137	173	175	239	241	98	102	186	190
3-09	LY	127	139	226	226	132	144	187	191	115	115	216	234	144	152	223	235	123	135	181	185	116	116	141	159	154	154	418	432	125	137	171	173	239	243	104	106	192	192
3-10	LY	145	145	226	232	134	136	187	191	115	115	216	216	144	148	225	229	123	123	171	179	114	114	159	163	136	154	412	414	135	135	175	177	213	249	104	108	182	188
4-01	SJ	139	149	226	226	132	136	193	207	119	119	236	238	148	152	221	229	123	125	175	175	106	116	151	151	152	152	412	436	121	125	173	175	237	241	90	104	192	192
4-02	SJ	139	151	226	226	130	136	189	205	115	121	226	234	148	150	221	223	127	127	187	187	106	106	157	157	144	148	412	418	125	125	175	177	213	213	106	116	190	190
4-03	SJ	139	139	226	226	134	144	193	195	115	119	216	228	144	148	227	227	123	127	177	195	116	116	153	155	140	140	418	420	135	145	173	173	213	239	104	106	184	192
4-04	SJ	143	151	226	226	130	136	189	193	115	115	228	230	150	154	213	217	125	125	167	179	106	106	153	155	148	148	412	416	125	125	173	173	213	243	104	106	190	190
4-05	SJ	149	151	226	230	136	138	191	195	115	115	230	234	148	148	221	221	123	125	167	181	112	116	163	163	144	156	426	426	137	137	173	173	213	213	98	108	184	186
4-06	SJ	143	151	232	240	140	142	193	193	115	117	216	230	144	150	0	0	125	125	189	199	106	122	151	163	158	158	412	412	121	125	173	173	213	241	94	104	186	186
4-07	SJ	139	149	226	226	130	134	189	195	115	119	228	230	148	150	223	223	127	131	157	177	106	116	163	163	136	168	412	422	125	141	173	173	213	241	106	106	186	186
4-08	SJ	139	145	226	230	136	136	189	191	115	117	230	234	148	148	221	227	123	129	173	183	116	116	153	155	144	150	412	418	123	135	175	175	213	239	102	104	184	184
4-09	SJ	149	151	226	230	140	140	193	197	121	121	228	236	144	148	221	221	123	125	171	187	106	106	153	153	150	150	412	418	135	137	173	173	237	241	104	106	184	192
4-10	SJ	139	139	226	226	134	136	215	217	117	119	232	232	148	150	219	225	123	127	179	179	106	118	155	159	138	138	412	418	135	137	173	173	239	241	102	110	186	192
5-01	KC	143	151	226	232	128	138	187	197	115	115	216	234	146	150	223	223	123	125	177	177	116	116	147	159	136	140	412	414	135	155	173	175	239	241	102	104	186	204
5-02	KC	149	151	226	226	136	136	195	215	115	121	228	232	148	152	227	229	123	125	169	193	106	116	153	153	148	170	412	412	125	135	173	175	213	239	104	106	198	198
5-03	KC	129	139	226	230	130	130	195	201	115	121	218	230	144	148	225	225	123	127	169	185	118	118	153	161	148	152	418	440	125	135	173	175	239	239	104	106	184	194
5-04	KC	137	139	226	226	132	136	191	197	119	121	216	230	150	150	223	229	123	123	175	175	116	116	155	159	138	152	418	426	125	125	173	173	239	241	102	106	186	190
5-05	KC	139	139	226	226	134	136	187	203	115	119	218	240	148	150	217	217	123	123	187	193	106	114	153	163	160	160	412	418	125	135	173	175	213	239	106	106	192	192
5-06	KC	139	151	228	236	134	136	189	199	115	117	228	242	148	150	221	221	121	125	165	177	114	116	151	153	140	160	412	412	125	125	173	173	213	239	102	102	186	192
5-07	KC	137	139	226	230	134	136	191	197	119	121	216	230	148	152	223	229	123	125	169	169	116	116	159	159	136	152	418	426	125	125	173	173	213	251	106	110	190	190
5-08	KC	137	139	226	230	130	134	187	197	115	121	218	230	148	150	227	229	125	125	169	181	106	116	155	155	136	144	412	412	125	125	173	173	213	241	106	110	188	188
5-09	KC	143	155	226	226	134	136	187	191	115	121	230	230	144	144	223	229	125	127	163	183	106	120	155	163	138	150	412	418	135	145	173	173	213	235	102	104	206	206
5-10	KC	137	143	226	226	132	142	197	205	121	121	218	230	148	150	221	221	123	129	175	175	106	116	151	159	136	142	412	432	125	125	173	173	213	245	108	110	190	190
6-01	SH	127	151	230	234	128	136	193	195	119	119	222	228	144	146	217	243	123	123	169	181	116	116	155	155	140	142	412	422	129	175	159	175	243	247	108	112	184	184
6-02	SH	127	153	230	236	128	134	191	193	113	119	222	224	144	150	227	231	123	123	167	181	116	116	155	155	132	142	422	422	137	145	159	175	243	249	102	112	184	222
6-03	SH	127	143	230	236	136	136	195	195	115	115	216	224	144	150	223	231	123	123	185	213	114	118	159	159	142	142	414	426	137	165	169	169	243	251	110	112	184	186
6-04	SH	151	175	232	232	128	136	193	199	115	119	216	222	144	148	217	227	125	125	187	213	112	116	157	157	140	154	412	422	125	129	173	173	241	243	102	112	186	192
6-05	SH	127	149	230	236	132	136	195	195	115	117	216	228	146	150	213	231	123	127	181	181	112	122	161	161	142	152	418	422	137	137	185	187	237	239	102	112	186	186
6-06	SH	127	127	232	234	132	136	187	195	115	115	216	222	144	150	221	221	123	125	165	181	110	118	157	157	142	144	424	426	129	153	175	175	241	243	110	112	184	186
6-07	SH	139	151	230	238	136	136	193	195	115	119	216	216	146	152	217	237	123	125	181	213	114	118	159	159	142	150	422	422	137	157	171	171	237	239	102	108	184	186
6-08	SH	127	139	230	256	136	136	193	193	115	119	216	222	144	148	227	231	123	129	165	181	112	118	155	155	142	142	422	432	137	139	181	183	241	243	108	112	186	186
6-09	SH	127	143	234	234	130	136	191	193	115	119	216	222	146	148	217	231	123	125	175	213	118	118	155	155	140	168	420	422	129	133	157	157	237	241	102	110	184	184
6-10	SH	127	139	230	234	128	136	195	197	115	115	216	230	144	148	223	231	123	123	165	181	114	114	157	157	142	150	412	422	137	163	175	175	241	243	110	112	186	192
7-01	LK	125	143	226	228	134	136	191	201	115	121	230	234	150	150	225	225	121	125	177	177	106	106	153	157	150	162	412	412	123	125	173	173	239	239	106	108	190	190
7-02	LK	137	143	226	232	132	134	187	191	115	115	216	242	144	148	223	233	125	127	169	183	116	116	155	155	148	152	412	418	125	125	173	175	239	241	102	102	198	198
7-03	LK	139	149	230	230	130	132	191	209	115	115	234	242	148	150	221	221	123	127	171	187	118	118	155	175	148	152	412	418	125	125	173	173	213	213	102	104	186	186
7-04	LK	139	143	226	228	132	132	185	191	115	115	230	236	148	148	233	243	123	127	169	183	116	116	155	155	140	140	412	416	123	123	175	179	213	239	104	106	186	198
7-05	LK	127	143	232	232	132	136	191	199	115	119	232	236	144	148	0	0	121	133	169	173	116	116	155	155	136	144	412	412	125	137	173	173	241	241	98	106	186	186
7-06	LK	139	143	226	232	136	138	203	207	0	0	216	222	0	0	0	0	0	0	169	169	0	0	155	159	148	158	0	0	135	135	173	173	213	241	98	104	0	0
7-07	LK	139	145	226	226	128	138	187	195	115	115	230	234	148	156	225	225	125	127	197	199	116	116	155	163	142	162	412	418	125	141	173	173	213	239	104	106	190	192
7-08	LK	149	155	226	228	136	136	185	191	115	123	230	236	148	152	221	249	125	125	175	187	116	116	155	159	140	162	412	416	123	139	173	175	239	243	104	104	190	198
7-09	LK	135	155	226	226	134	136	195	203	117	123	224	228	150	158	221	221	115	125	189	191	106	120	157	161	154	158	412	412	123	135	173	173	239	243	102	106	190	192
7-10	LK	139	139	226	228	136	138	185	191	115	117	226	234	150	150	227	227	125	135	177	177	106	106	155	159	142	150	416	420	139	139	173	179	239	241	104	104	192	192
8-01	DS	139	139	228	230	132	142	187	189	115	115	216	230	148	150	213	231	125	127	179	179	106	116	151	151	136	168	412	418	123	125	173	175	239	239	102	106	186	188
8-02	DS	139	153	226	236	132	134	191	191	115	119	230	230	144	148	221	221	125	125	187	199	106	114	153	153	150	150	412	412	123	123	171	179	213	237	104	108	192	192
8-03	DS	139	151	226	226	136	136	185	189	115	115	216	230	150	150	223	227	123	125	177	181	118	122	151	153	132	132	420	428	123	135	173	175	239	239	104	108	186	188
8-04	DS	143	153	226	226	134	136	195	203	117	117	230	232	144	148	223	233	123	125	167	169	106	122	157	161	132	150	412	424	123	125	161	173	213	215	102	108	186	194
8-05	DS	143	155	230	230	132	134	191	193	115	119	218	234	148	150	227	245	123	125	169	179	106	116	151	165	154	154	412	412	125	135	173	173	239	241	104	106	186	188
8-06	DS	139	139	230	230	128	128	191	193	115	119	218	232	148	148	229	229	123	125	173	179	106	118	153	153	148	148	412	412	121	125	173	173	213	239	102	106	190	190
8-07	DS	149	151	226	230	134	136	189	203	115	115	228	230	148	152	241	243	115	125	175	175	116	120	153	157	136	136	412	420	125	125	173	173	237	241	104	108	206	206
8-08	DS	139	139	226	250	130	134	195	201	121	125	228	234	148	150	213	231	123	127	169	179	110	116	151	155	136	144	412	418	125	131	171	171	239	243	102	104	184	192
8-09	DS	139	151	228	232	134	136	187	203	115	115	216	228	150	152	237	241	123	125	167	169	106	118	153	153	150	158	412	424	125	141	173	173	239	239	96	104	188	192
8-10	DS	139	153	230	230	130	134	191	199	115	115	230	234	148	150	221	223	123	125	167	167	106	106	147	147	144	144	412	412	125	125	175	175	241	241	102	106	190	190
9-01	SM	127	139	232	244	134	138	189	215	117	119	234	234	148	154	221	221	125	129	167	171	118	120	155	155	136	150	420	420	121	121	165	179	237	239	98	104	190	190
9-02	SM	145	147	226	230	130	140	193	195	115	121	226	240	150	150	231	233	123	123	177	187	116	116	155	159	136	150	412	412	125	125	165	171	239	251	104	106	186	215
9-03	SM	139	145	226	230	132	136	197	201	117	121	232	232	150	150	223	223	123	125	177	181	120	120	151	151	140	144	412	412	123	125	159	173	213	237	108	108	192	192
9-04	SM	125	149	230	230	130	140	191	206	115	115	230	230	148	150	221	225	123	123	179	181	116	120	151	155	156	156	0	0	125	125	173	173	213	237	104	108	192	192
9-05	SM	139	145	230	230	130	136	189	189	121	121	226	228	148	148	231	231	123	123	189	191	106	114	155	155	150	170	412	418	127	127	173	173	213	213	98	106	184	188
9-06	SM	143	147	230	230	130	136	191	195	115	115	224	224	148	150	221	221	125	127	177	177	114	116	155	161	136	136	412	412	125	125	165	173	239	241	104	106	190	190
9-07	SM	139	153	230	230	130	130	201	210	115	121	224	232	144	148	221	227	115	125	169	187	116	118	153	157	132	154	418	432	125	125	173	173	213	259	114	116	184	184
9-08	SM	143	159	232	232	130	132	195	203	115	115	218	228	150	152	0	0	123	125	177	183	112	112	153	155	148	158	412	412	125	125	173	173	213	213	104	106	190	190
9-09	SM	139	153	226	226	130	136	187	193	115	115	218	224	148	152	213	225	123	123	181	189	106	116	157	157	150	158	412	412	125	125	163	173	239	239	104	106	184	190
9-10	SM	127	147	230	254	130	134	191	197	115	121	218	222	148	150	223	235	118	125	167	175	116	118	155	155	142	144	420	420	121	125	173	177	239	239	98	106	190	190
10-01	ZW	151	151	234	234	134	154	187	201	119	119	216	230	148	150	227	227	123	123	183	187	106	116	147	147	144	144	412	412	125	125	161	171	245	249	100	112	192	192
10-02	ZW	137	139	228	230	134	134	187	207	115	121	228	228	150	158	227	235	123	127	185	197	106	118	155	155	140	160	412	412	123	125	173	173	213	237	94	106	186	186
10-03	ZW	137	139	226	226	132	134	191	193	115	119	230	230	144	150	221	221	123	135	163	171	106	114	163	163	138	144	412	418	133	133	173	173	213	239	104	104	198	198
10-04	ZW	139	149	226	232	130	140	187	195	117	117	228	238	144	148	221	221	123	127	165	169	106	116	155	155	136	144	412	418	125	135	169	173	241	245	104	106	184	184
10-05	ZW	137	139	232	236	136	138	189	191	115	119	230	238	150	150	225	225	125	125	165	181	114	114	161	161	138	150	412	418	123	125	173	173	213	239	102	104	190	190
10-06	ZW	149	151	240	240	134	134	189	191	115	115	228	236	148	148	225	227	125	125	181	185	116	120	153	155	144	156	418	432	125	125	173	173	241	241	106	106	186	194
10-07	ZW	127	145	226	226	136	136	193	193	115	123	216	232	156	156	233	233	125	125	177	185	108	118	153	153	148	152	412	412	121	125	171	175	239	239	104	104	188	188
10-08	ZW	135	139	232	232	132	136	193	201	115	115	218	236	148	150	223	229	123	125	173	183	106	116	153	153	136	144	412	412	125	127	173	179	241	241	106	108	190	190
10-09	ZW	139	149	226	244	130	132	195	203	115	115	218	236	148	148	219	221	123	125	169	185	106	116	155	155	154	160	412	420	123	125	175	177	239	239	102	106	192	192
10-10	ZW	139	139	226	228	134	136	203	206	115	115	228	230	148	148	223	225	125	135	171	193	114	116	155	161	136	148	412	420	117	135	173	173	239	243	102	104	192	200
11-01	DT	159	163	226	230	128	130	187	187	119	121	226	230	150	150	223	225	123	123	173	201	104	104	161	161	148	148	412	420	123	125	173	179	239	243	104	104	196	196
11-02	DT	133	139	226	232	130	134	195	199	115	115	230	236	148	154	221	221	123	137	181	181	114	114	149	163	148	150	412	426	125	135	173	173	239	243	104	106	182	182
11-03	DT	139	153	226	228	134	136	191	197	117	119	230	230	148	150	229	229	123	123	179	185	122	122	157	157	136	142	412	418	121	135	165	173	237	237	102	104	184	184
11-04	DT	0	0	228	230	128	130	199	209	115	121	228	230	150	150	0	0	123	127	169	175	106	106	151	163	144	144	412	442	121	125	173	175	213	239	102	106	188	188
11-05	DT	135	163	226	230	130	136	193	195	115	119	228	235	148	150	223	227	121	123	179	179	116	116	161	161	144	150	412	426	125	135	171	173	239	243	98	104	188	196
11-06	DT	143	143	232	232	134	136	189	195	117	119	230	236	144	148	221	221	123	123	169	175	106	116	147	155	144	152	412	420	125	125	173	173	239	239	102	108	184	198
11-07	DT	139	151	226	226	132	136	195	197	117	119	218	234	150	150	223	227	123	125	171	179	114	116	155	163	132	150	412	414	125	135	173	173	239	243	102	108	190	196
11-08	DT	127	139	226	240	134	136	187	193	115	115	230	230	150	152	221	221	125	127	179	183	116	116	153	153	136	144	412	418	125	135	173	173	239	239	104	106	182	188
11-09	DT	137	153	232	232	136	142	187	195	119	119	228	232	144	150	221	221	123	125	169	201	116	116	149	161	132	164	412	412	125	135	173	175	239	239	106	106	188	188
11-10	DT	139	145	226	226	130	136	183	187	115	119	234	246	144	154	217	221	123	123	181	183	106	116	159	159	136	148	412	418	125	135	163	173	241	245	98	106	194	206
12-01	NC	127	129	226	226	136	136	189	195	119	119	230	250	150	152	219	219	125	125	175	181	114	114	149	151	154	162	412	420	137	137	171	173	243	245	104	114	182	186
12-02	NC	125	127	236	240	0	0	177	209	115	115	222	222	150	152	0	0	123	123	177	179	116	116	157	159	144	158	412	420	131	155	165	167	237	241	104	114	184	184
12-03	NC	147	149	236	240	0	0	195	201	117	121	222	248	148	150	223	225	123	127	181	183	106	106	155	157	144	144	412	422	135	159	169	175	241	241	108	114	182	184
12-04	NC	147	163	226	226	136	138	189	209	115	115	231	240	148	148	0	0	125	125	177	177	116	116	157	157	158	172	412	420	121	123	173	177	239	241	110	112	186	186
12-05	NC	127	143	226	230	132	136	193	197	115	121	222	224	148	150	227	237	123	125	177	183	114	120	155	159	136	148	416	426	121	125	169	169	239	243	104	112	182	186
12-06	NC	127	139	230	246	130	140	187	195	115	117	230	230	150	160	223	223	125	127	177	187	106	120	151	155	136	148	432	448	133	133	173	175	243	243	108	110	184	184
12-07	NC	127	127	226	230	138	138	185	189	115	119	228	234	146	148	255	255	123	123	183	185	106	106	149	153	132	152	414	422	145	175	173	191	237	241	110	112	192	192
12-08	NC	137	153	226	234	132	136	189	189	115	117	222	244	152	154	231	231	123	123	165	173	106	120	149	153	140	144	412	424	133	137	161	175	239	243	108	112	188	188
12-09	NC	127	127	230	234	136	138	185	199	115	119	222	222	148	150	221	221	125	125	175	177	110	116	153	155	136	148	416	418	131	131	153	169	239	239	108	112	186	188
12-10	NC	137	151	234	236	0	0	187	187	115	117	230	230	150	152	0	0	123	125	171	173	106	106	153	155	136	144	412	418	123	153	173	175	213	243	104	108	182	182
